# Supplementary material for: Systemic LPS Administration Stimulates the Activation of Non-Neuronal Cells in an Experimental Model of Spinal Muscular Atrophy
Source: MDPI journal article supplement (doi:10.3390/cells13090785), 2024-05-04
Supplement: s1 [file s1]

## Supplementary Material

**Table S1.** Primary antibodies used for immunohistochemistry and WB

| Antibody name              | Host   | Catalogue number | Supplier                     |
|----------------------------|--------|------------------|------------------------------|
| anti-SMN                   | mouse  | 610646           | BD Transduction Laboratories |
| anti- beta actin           | rabbit | 4970S            | Cell signaling               |
| anti-GAPDH                 | rabbit | 10494-1-AP       | Proteintech                  |
| anti-Iba-1                 | rabbit | 019-19741        | Wako                         |
| anti-GFAP                  | rabbit | Z0334            | Dako                         |
| anti – SYP                 | mouse  | MO776            | Dako                         |
| anti-CD206                 | goat   | sc-34577         | Santa cruz                   |
| anti- iNOS                 | mouse  | sc-7271          | Santa cruz                   |
| anti-S100A10               | goat   | AF2377           | Biotechnie, R & D systems    |
| anti-complement<br>C3b/C3c | mouse  | HM1065           | Hycult Bioteck               |

**Table S2.** Secondary antibodies used for immunohistochemistry and WB

| Antibody name           | Host   | Catalogue number | Supplier       |
|-------------------------|--------|------------------|----------------|
| anti-mouse IgG-<br>HRP  | horse  | 7076S            | Cell signaling |
| anti-rabbit IgG-<br>HRP | goat   | A0545            | Sigma Aldrich  |
| anti-rabbit IgG         | goat   | BA-1000          | Vector         |
| anti-rabbit 488A        | goat   | 20012            | Biotium        |
| anti-mouse 555          | goat   | 20030            | Biotium        |
| anti-goat 555           | donkey | 20039            | Biotium        |

## **Sup. Material 1**

### **ABBREVIATIONS:**

|                                |                                               |
|--------------------------------|-----------------------------------------------|
| <b>A<sub>c</sub></b>           | Cell's area                                   |
| <b>A<sub>p</sub></b>           | Projection area                               |
| <b>AD</b>                      | Alzheimer's disease                           |
| <b>ALS</b>                     | Amyotrophic lateral sclerosis                 |
| <b>a-MNs</b>                   | Alpha Motor Neurons                           |
| <b>CNS</b>                     | Central nervous system                        |
| <b>DAB</b>                     | 3,3'-diaminobenzidine                         |
| <b>ECL</b>                     | Enhanced chemiluminescence                    |
| <b>FBS</b>                     | Fetal Bovine Serum                            |
| <b>HRP</b>                     | Horseradish peroxidase                        |
| <b>IL1<math>\beta</math></b>   | Interleukin-1beta                             |
| <b>LPS</b>                     | Lipopolysaccharides                           |
| <b>MCP-1</b>                   | Monocyte chemoattractant protein 1 expression |
| <b>NF-<math>\kappa</math>B</b> | Nuclear factor kappa B                        |
| <b>NGS</b>                     | Normal Goat Serum                             |
| <b>P5</b>                      | Postnatal day 5                               |
| <b>PBS</b>                     | Phosphate-buffered saline                     |
| <b>PDVF</b>                    | Polyvinylidene difluoride                     |
| <b>pre-mRNA</b>                | Precursor mRNAs                               |
| <b>RT</b>                      | Room temperature                              |
| <b>SMA</b>                     | Spinal muscular atrophy                       |
| <b>SMN</b>                     | Survival Motor Neuron protein                 |
| <b>SYP</b>                     | Synaptophysin                                 |
| <b>TLR4</b>                    | Toll-like receptor 4                          |
| <b>TNF-<math>\alpha</math></b> | Tumor necrosis factor alpha                   |
| <b>UBA1</b>                    | Ubiquitin Like Modifier Activating Enzyme 1   |
| <b>WB</b>                      | Western blot                                  |
